# Supplementary material for: Brief report – Telomere length is a poor biomarker to predict 1-year mortality or cardiovascular comorbidity in patients with transcatheter aortic valve replacement
Source: PLoS One. 2019 Mar 12;14(3):e0213250. doi: 10.1371/journal.pone.0213250 (PMC6413932; doi:10.1371/journal.pone.0213250)
Supplement: S1 Data — (XLSX) [file pone.0213250.s001.xlsx]

## Sheet: Tabelle1
LTL=telomere length	EUROScore	AVA (cm2)	LVEF (%)	Pmean (mmHg)			LTL no PAD	LTL PAD	LTL no CAD	LTL CAD	LTL no CVD	LTL CVD
short	15.46	0.7	63	44		telomere lenth	0.52	0.51	0.52	0.51	0.52	0.51
short	23.4	0.9	66	20		telomere lenth	0.52	0.51	0.52	0.5	0.52	0.51
short	12.69	0.8	64	92		telomere lenth	0.51	0.49	0.51	0.49	0.51	0.48
short	10.66	0.47	74	105.7		telomere lenth	0.51	0.48	0.51	0.48	0.51	0.47
short	24.04	0.9	34	43		telomere lenth	0.5	0.47	0.51	0.48	0.5	0.47
short	6.21	0.9	65	33		telomere lenth	0.49	0.47	0.49	0.48	0.49	0.47
short	10.35	0.6	63	28		telomere lenth	0.49	0.47	0.48	0.47	0.49	0.47
short	10.38	0.9	71	55		telomere lenth	0.48	0.46	0.46	0.47	0.48	0.46
short	11.69	0.5	43	51		telomere lenth	0.48	0.45	0.46	0.47	0.48	0.46
short	6.63	0.8	40	35		telomere lenth	0.48	0.44	0.46	0.47	0.48	0.45
short	11.39	0.7	48	64		telomere lenth	0.47	0.43	0.45	0.47	0.47	0.45
short	13.44	0.7	33	54		telomere lenth	0.46	0.43	0.45	0.46	0.46	0.44
short	22.06	0.6	61	67		telomere lenth	0.46	0.41	0.45	0.46	0.46	0.43
short	10.95	0.6	55	43		telomere lenth	0.46	0.27	0.44	0.45	0.46	0.41
short	26.7	0.9	67	35		telomere lenth	0.45		0.44	0.45	0.45	0.39
short	37.66	0.6	56	50		telomere lenth	0.45	0.72	0.41	0.44	0.45	0.27
short	20.21	0.7	63	33		telomere lenth	0.45	0.7	0.39	0.43	0.45
short	11.29	0.9	70	41		telomere lenth	0.44	0.67	0.38	0.43	0.44	0.72
short	27.39	0.75	60	39		telomere lenth	0.44	0.67	0.37	0.43	0.44	0.69
short	12.08	0.6	70	45		telomere lenth	0.43	0.66	0.36	0.43	0.43	0.67
short	7.48	0.7	70	32		telomere lenth	0.43	0.66	0.35	0.41	0.43	0.66
short	32.34	0.99	51	38		telomere lenth	0.43	0.64	0.31	0.41	0.43	0.66
short	11.66	1	75	38		telomere lenth	0.41	0.63	0.27	0.4	0.41	0.64
short	12.29	0.8	58	38		telomere lenth	0.41	0.6		0.38	0.41	0.63
short	10.11	0.6	44	38		telomere lenth	0.4	0.6	0.7	0.37	0.4	0.6
short	8.99	0.7	55	66		telomere lenth	0.38	0.6	0.69	0.36	0.38	0.6
short	31.05	0.7	45	55		telomere lenth	0.38	0.59	0.68	0.34	0.38	0.6
short	15.56	0.7	68	32		telomere lenth	0.37	0.59	0.68	0.33	0.37	0.59
short	12.81	0.9	59	27		telomere lenth	0.37	0.58	0.64	0.3	0.37	0.59
short	20.28	0.6	25	42		telomere lenth	0.36	0.58	0.64		0.36	0.58
short	27.87	0.95	65	43		telomere lenth	0.36	0.57	0.63	0.72	0.36	0.58
short	24.53	0.78	56	20.5		telomere lenth	0.35	0.54	0.63	0.72	0.35	0.57
short	2.54	0.7	76	49		telomere lenth	0.34	0.54	0.6	0.72	0.34	0.54
short	70.1	0.65	58	24		telomere lenth	0.33	0.53	0.6	0.7	0.33	0.54
short	15.81	1	71	38		telomere lenth	0.31		0.59	0.69	0.31	0.53
short	13.48	0.9	72	38		telomere lenth	0.3	1.15	0.59	0.69	0.3
short	12.29	0.5	70	30		telomere lenth		1.15	0.58	0.67		1.15
short	41.89	0.8	65	26		telomere lenth	0.72	1.13	0.58	0.67	0.72	1.15
short	7.48	0.6	58	49		telomere lenth	0.72	1	0.56	0.67	0.72	1.13
short	15.95	0.5	71	48		telomere lenth	0.7	0.95	0.56	0.66	0.7	1.07
short	18.76	0.6	55	42		telomere lenth	0.7	0.9	0.54	0.66	0.7	1.06
short	32.49	0.8	55	60		telomere lenth	0.69	0.89	0.54	0.64	0.69	1
short	13.11	0.8	65	20		telomere lenth	0.69	0.89	0.53	0.64	0.69	0.95
short	17.09	0.9	55	35		telomere lenth	0.68	0.85		0.63	0.68	0.9
short	21.69	0.6	55	80		telomere lenth	0.68	0.79	1.22	0.63	0.68	0.89
short	30.94	0.9	70	45		telomere lenth	0.67	0.79	1.15	0.61	0.67	0.89
short	37.87	0.9	44	37		telomere lenth	0.67	0.76	1.13	0.6	0.67	0.89
short	25.61	0.9	62	30		telomere lenth	0.64	0.75	1.13	0.6	0.64	0.85
short	22.78	0.7	36	27		telomere lenth	0.64	0.75	1.11	0.6	0.64	0.81
short	19.48	0.5	48	65		telomere lenth	0.64	0.75	1.03	0.6	0.64	0.79
short	24.04	0.75	65	53		telomere lenth	0.63	0.74	1.03	0.59	0.63	0.76
short	17.65	0.61	57	42		telomere lenth	0.63		1.01	0.59	0.63	0.76
medium	10.95	0.85	65	46		telomere lenth	0.63		1	0.58	0.63	0.75
medium	26.7	0.5	42	52		telomere lenth	0.61		1	0.57	0.61	0.75
medium	16.87	0.6	70	31		telomere lenth	0.6		0.95	0.57	0.6	0.74
medium	27.39	0.8	50	37		telomere lenth	0.6		0.9	0.57	0.6
medium	12.08	0.69	40	43		telomere lenth	0.6		0.9	0.57	0.6
medium	10.11	0.75	55	42		telomere lenth	0.59		0.89	0.56	0.59
medium	12.81	0.6	61	41		telomere lenth	0.59		0.89	0.54	0.59
medium	20.28	0.8	60	45		telomere lenth	0.58		0.89	0.53	0.58
medium	24.04	0.8	61	49		telomere lenth	0.57		0.86	0.53	0.57
medium	35.11	0.8	61	22		telomere lenth	0.56		0.83	0.53	0.57
medium	20.54	0.69	55	40		telomere lenth	0.56		0.83	0.52	0.57
medium	26.2	0.68	62	37		telomere lenth	0.56		0.81		0.56
medium	16.19	0.7	65	32		telomere lenth	0.54		0.79	1.28	0.56
medium	26.58	0.99	65	47		telomere lenth	0.53		0.77	1.21	0.56
medium	7.96	1	52	55		telomere lenth	0.53		0.76	1.15	0.54
medium	14.24	0.64	55	82		telomere lenth	0.53		0.76	1.07	0.53
medium	8.44	0.44	64	50		telomere lenth	0.52		0.75	1.06	0.53
medium	27.02	0.7	68	92		telomere lenth			0.74	1.06	0.53
medium	25.39	0.9	40	18		telomere lenth	1.28			1.04	0.52
medium	7.48	0.44	60	60		telomere lenth	1.22			1.02
medium	12.25	0.9	58	50		telomere lenth	1.21			0.96	1.28
medium	15.03	0.8	65	67		telomere lenth	1.13			0.95	1.22
medium	9.55	0.75	41	45		telomere lenth	1.11			0.9	1.21
medium	6.59	0.7	70	33		telomere lenth	1.07			0.9	1.13
medium	8.27	0.5	73	56		telomere lenth	1.06			0.85	1.11
medium	29.36	0.7	65	43		telomere lenth	1.06			0.85	1.06
medium	8.35	0.9	73	65		telomere lenth	1.04			0.81	1.04
medium	8.05	0.7	61	41		telomere lenth	1.03			0.81	1.03
medium	18.82	0.5	60	34		telomere lenth	1.03			0.79	1.03
medium	10.29	0.7	54	26		telomere lenth	1.02			0.79	1.02
medium	6.55	1.2	55	29		telomere lenth	1.01			0.78	1.01
medium	35.11	0.6	62	29		telomere lenth	1			0.77	1
medium	29	0.9	30	39		telomere lenth	0.96			0.76	0.96
medium	21	0.9	51	42		telomere lenth	0.95			0.76	0.95
medium	16.25	0.8	71	48		telomere lenth	0.9			0.76	0.9
medium	33.37	0.6	45	38		telomere lenth	0.9			0.75	0.9
medium	12.08	0.6	73	62		telomere lenth	0.9			0.75	0.9
medium	13.67	0.7	55	14		telomere lenth	0.89				0.86
medium	12.14	0.78	50	63.4		telomere lenth	0.86				0.85
medium	19.51	0.9	52	57		telomere lenth	0.85				0.83
medium	31.17	0.78	60	48		telomere lenth	0.83				0.83
medium	4.53	0.8	65	35		telomere lenth	0.83				0.81
medium	22.06	0.9	50	83		telomere lenth	0.81				0.81
medium	4.76	0.8	55	55		telomere lenth	0.81				0.79
medium	15.62	0.5	75	66		telomere lenth	0.81				0.79
medium	12	0.7	65	38		telomere lenth	0.79				0.78
medium	11.82	0.8	65	36		telomere lenth	0.78				0.77
medium	25.47	0.85	58	38		telomere lenth	0.77				0.77
medium	34.62	0.55	25	60		telomere lenth	0.77				0.76
medium	17.43	0.9	65	40		telomere lenth	0.76				0.76
medium	26.2	0.7	62	44		telomere lenth	0.76				0.76
medium	47.03	0.9	70	46		telomere lenth	0.76				0.75
long	17.45	0.7	28	60		telomere lenth	0.76
long	11.39	0.9	68	32		telomere lenth	0.75
long	6.37	0.5	60	43		telomere lenth	0.74
long	6.59	0.7	70	48		telomere lenth	0.73
long	29.36	0.7	56	52
long	12.29	0.7	49	30
long	13.67	0.9	51	42
long	4.76	0.9	56	47
long	13.48	0.8	55	49
long	12.29	0.6	43	15
long	15.62	1	29	34
long	7.65	1	59	32
long	10.11	0.9	57	40
long	29.58	1	30	41
long	4.8	0.7	65	55
long	32.49	0.8	32	26
long	13.11	0.6	55	68
long	17.09	0.8	65	27
long	8.35	0.85	52	46
long	30.94	0.5	30	42
long	10.85	0.7	41	52
long	9.52	0.37	41	54
long	2.89	0.73	55	50
long	14.24	0.8	63	42
long	10.89	0.75	50	32
long	7.65	0.3	60	69
long	11.59	0.7	66	62
long	3.9	0.9	67	13
long	11.29	0.9	33	41
long	29.58	0.5	60	43
long	23.26	0.8	33	42
long	16.87	0.9	42	46
long	15.76	0.85	29	56
long	5.83	0.68	38	23
long	22.34	0.9	75	36
long	8.67	0.8	60	46
long	22.11	0.6	30	43
long	6.21	1.6	50	32
long	14.1	0.8	55	11
long	11.39	0.4	28	100
long	49.23	0.71	61	28
long	4.53	0.8	33	46
long	5.94	0.85	39	36
long	26.2	1	42	26
long	11.39	0.6	64	53
long	26.58	0.7	65	40
long	18.05	0.53	53	20
long	7.19	0.8	55	46
long	25.42	0.8	56	53
long	49.2	0.97	30	38
long	25.39	0.7	60	50
